# Supplementary material for: Smoking Prevalence among Physicians: A Systematic Review and Meta-Analysis
Source: MDPI journal article supplement (doi:10.3390/ijerph182413328), 2021-12-17
Supplement: s1 [file s1]

Supplementary Materials:

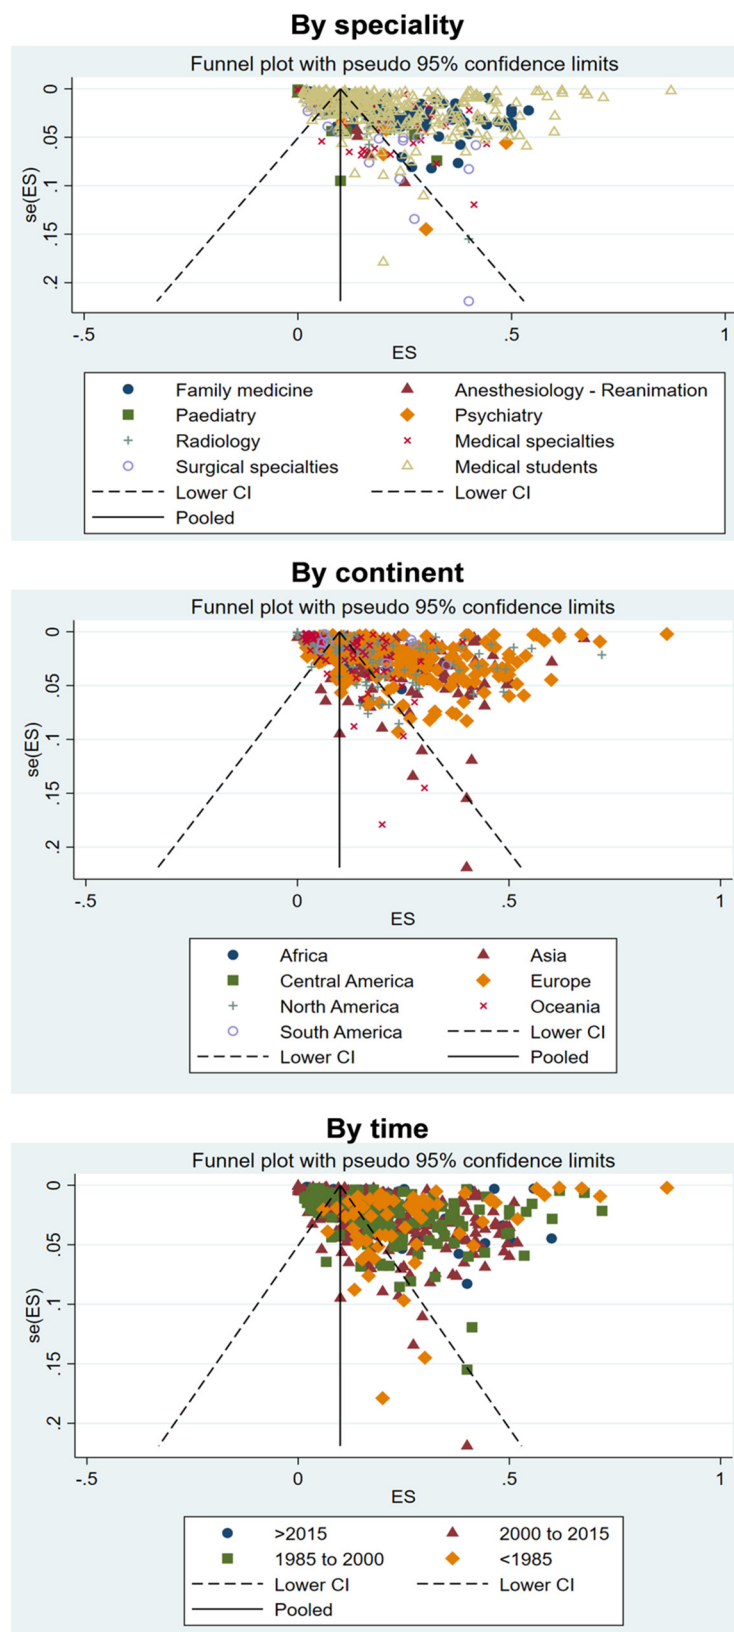

Figure S1. Funnel plots.

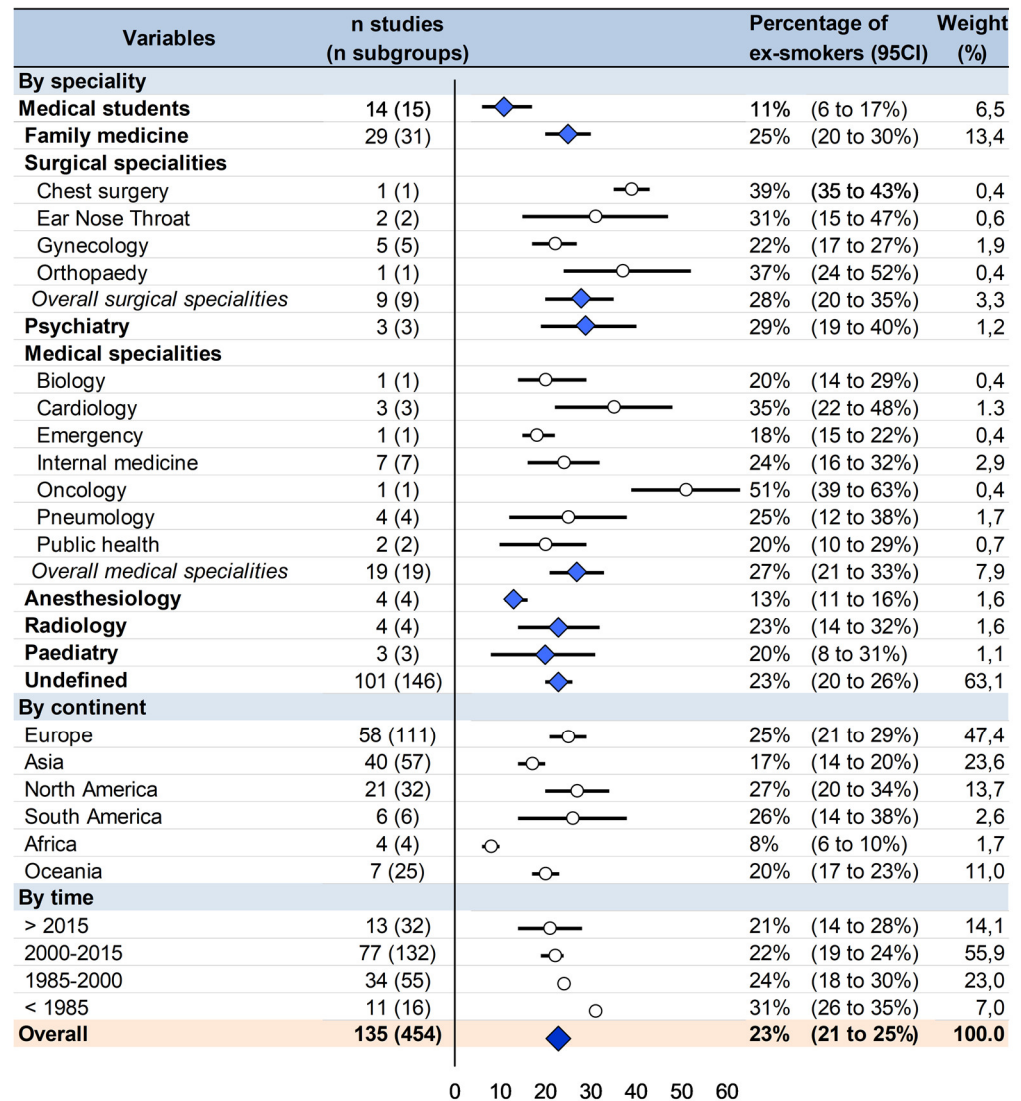

Figure S2. Meta-analysis on prevalence of ex-smokers among physicians.

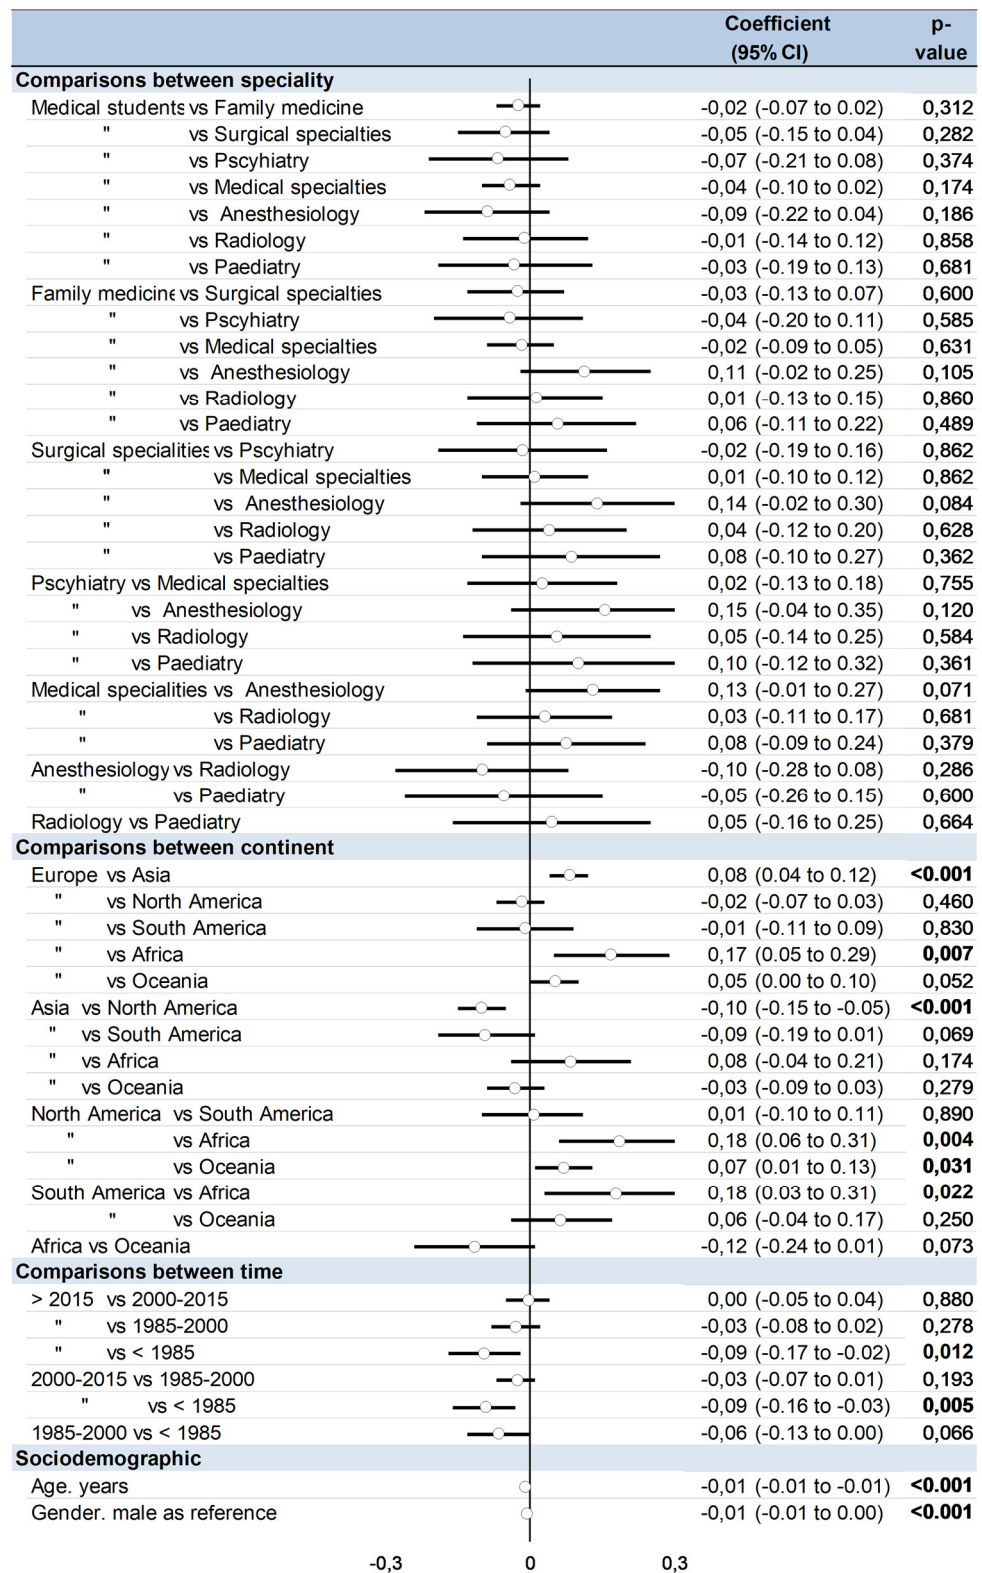

Figure S3. Comparisons.
